# Supplementary material for: Expression of Annexin A2 Promotes Cancer Progression in Estrogen Receptor Negative Breast Cancers
Source: PubMed Central journal article supplement (PMC7407301; doi:10.3390/cells9071582), 2020-06-30
Supplement: cells-09-01582-s001.pdf [file cells-09-01582-s001.pdf]

## Supplementary information

### Expression of Annexin A2 promotes progression in estrogen receptor negative breast cancer

Amira F. Mahdi<sup>1,2</sup>, Beatrice Malacrida<sup>1,2</sup>, Joanne Nolan<sup>1,2</sup>, Mary E. McCumiskey<sup>3,4</sup>, Anne B. Merrigan<sup>4</sup>, Ashish Lal<sup>4</sup>, Shona Tormey<sup>4</sup>, Aoife J. Lowery<sup>5</sup>, Kieran McGourty<sup>2,6</sup>, Patrick A. Kiely<sup>\*1,2</sup>

<sup>1</sup>Graduate Entry Medical School, University of Limerick, Limerick, Ireland; amira.mahdi@ul.ie (A.F.M); b.malacrida@qmul.ac.uk (B.M); joanne.nolan@ul.ie (J.N); patrick.kiely@ul.ie (P.A.K)

<sup>2</sup>Health Research Institute, University of Limerick and Bernal Institute, University of Limerick, Ireland; kieran.mcgourty@ul.ie (K.MG)

<sup>3</sup>Stokes Laboratories, Bernal Institute, University of Limerick, Limerick; mary.mccumiskey@ul.ie (M.E.MC)

<sup>4</sup>Department of Surgery, University Hospital Limerick, Limerick, Ireland; ashish.lal@hse.ie (A.L) anne.merrigan@hse.ie (A.B.M); shona.tormey@hse.ie (S.T)

<sup>5</sup>Lambe Institute for Translational Research, National University of Ireland Galway, Ireland; aoife.lowery@nuigalway.ie (A.J.L)

<sup>6</sup>Department of Chemical Sciences, University of Limerick, Limerick, Ireland.

\* **Correspondence:** [patrick.kiely@ul.ie](mailto:patrick.kiely@ul.ie) ; Tel.: +353-61-202811

# Figure S1

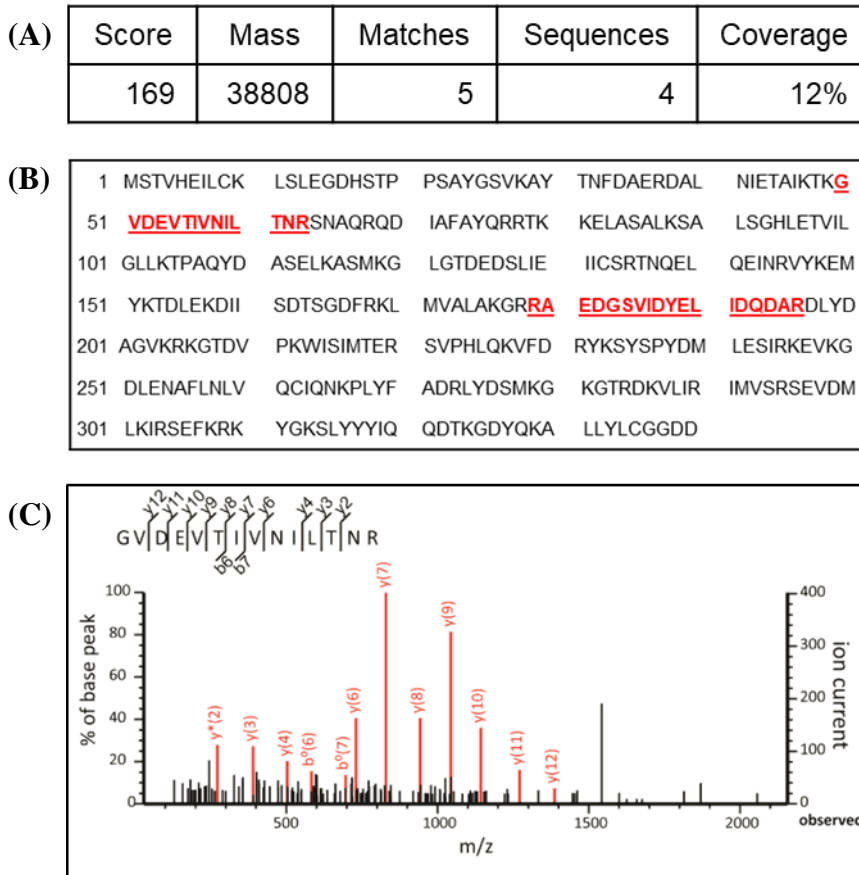

**Figure S1: Mass spectrometry identification of Annexin A2 as a protein newly synthesised during the EGF stimulated migration and invasion of MDA-MB-231 cells.**

(A& B) Scoring, mass, sequence coverage and matched peptides from MASCOT peptide identification (C) representative mass spectrum of AnxA2 peptide

# Figure S2

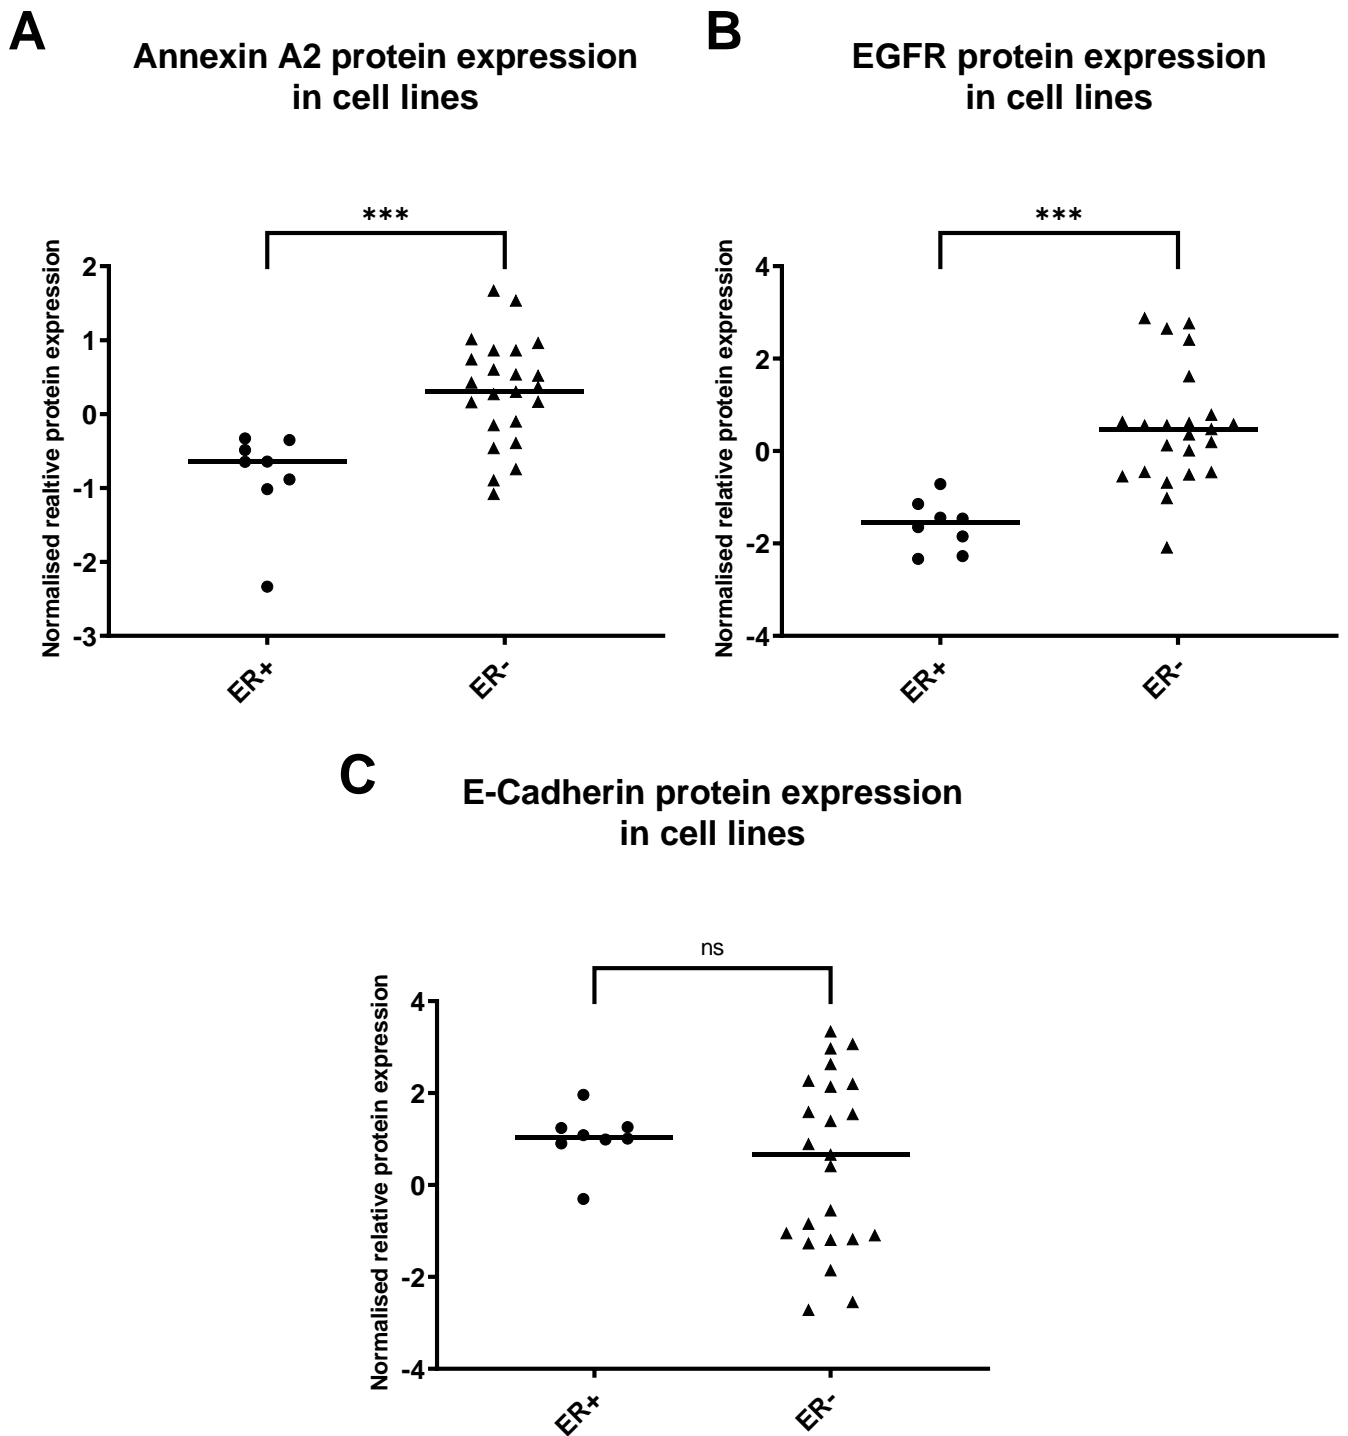

**Figure S2: Graphs of Annexin A2, EGFR and E-Cadherin protein expression data from Nusinow, D. P. et al. (2020)[1], stratified according to ER status ( ER+ n=8 , ER- n=23). Analysis showed (A) Annexin A2 (p=0.0008) and (B) EGFR (p <0.0001) are significantly upregulated in ER- breast cancer cell lines. (C) No significant difference was seen for E-Cadherin expression (p= 0.6105). Protein expression represented as normalised protein expression, as measured by quantitative proteomics. Statistical difference between groups tested using Mann Whitney U test.**

[1]: Nusinow, D. P., et al. (2020). "Quantitative Proteomics of the Cancer Cell Line Encyclopedia." *Cell* **180**(2): 387-402 e316.

**Figure S3 (A)**

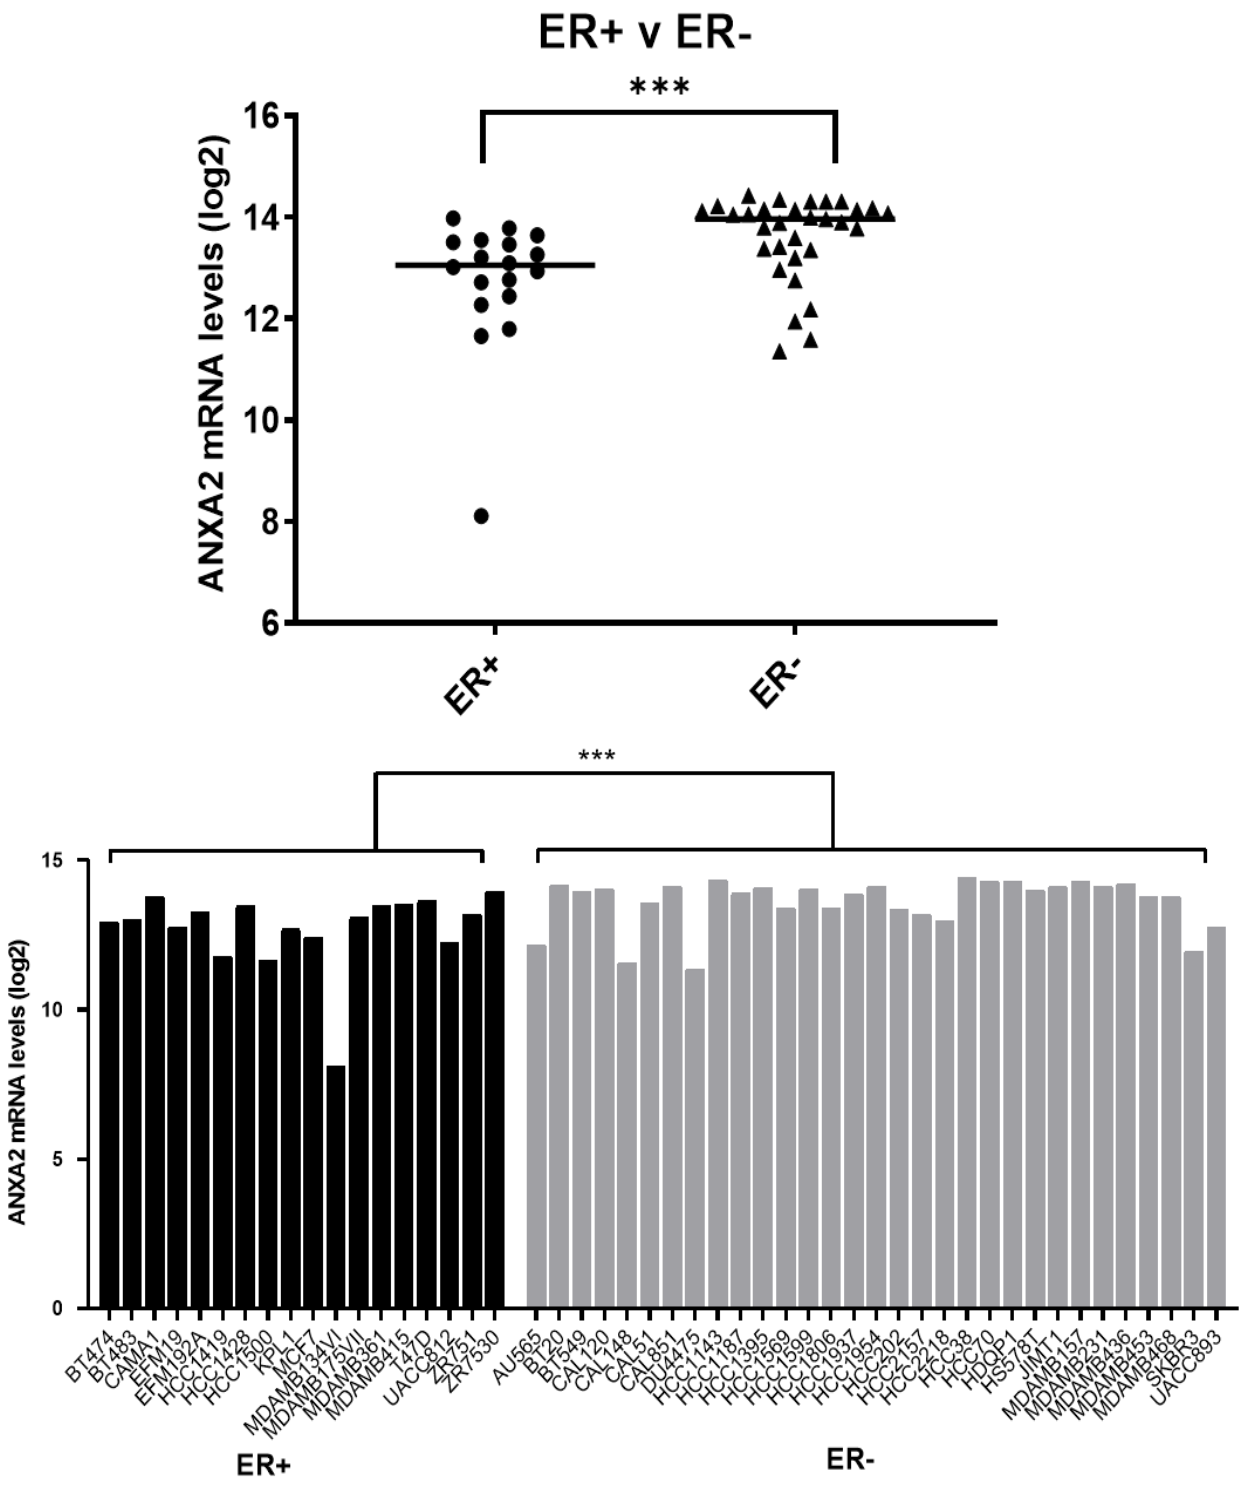

**Figure S3:** Publicly available Affymetrix gene expression data for human breast cancer cell lines was obtained from the CCLE [2]. Cell lines were categorised according to ER, PR and HER2 expression status and difference in ANXA2 expression between the two groups was measured using Mann-Whitney U test. (A) ANXA2 expression is higher in ER- cell lines,  $p = 0.0008$  (B) ANXA2 expression is higher in PR- cell lines,  $p = 0.0244$  (C) ANXA2 expression is not significantly different between HER2+ and HER2- cell lines.  $p = 0.0769$

[2]: Barretina, J., et al. (2012). "The Cancer Cell Line Encyclopedia enables predictive modelling of anticancer drug sensitivity." *Nature* **483**(7391): 603-607.

**Figure S3 (B)**

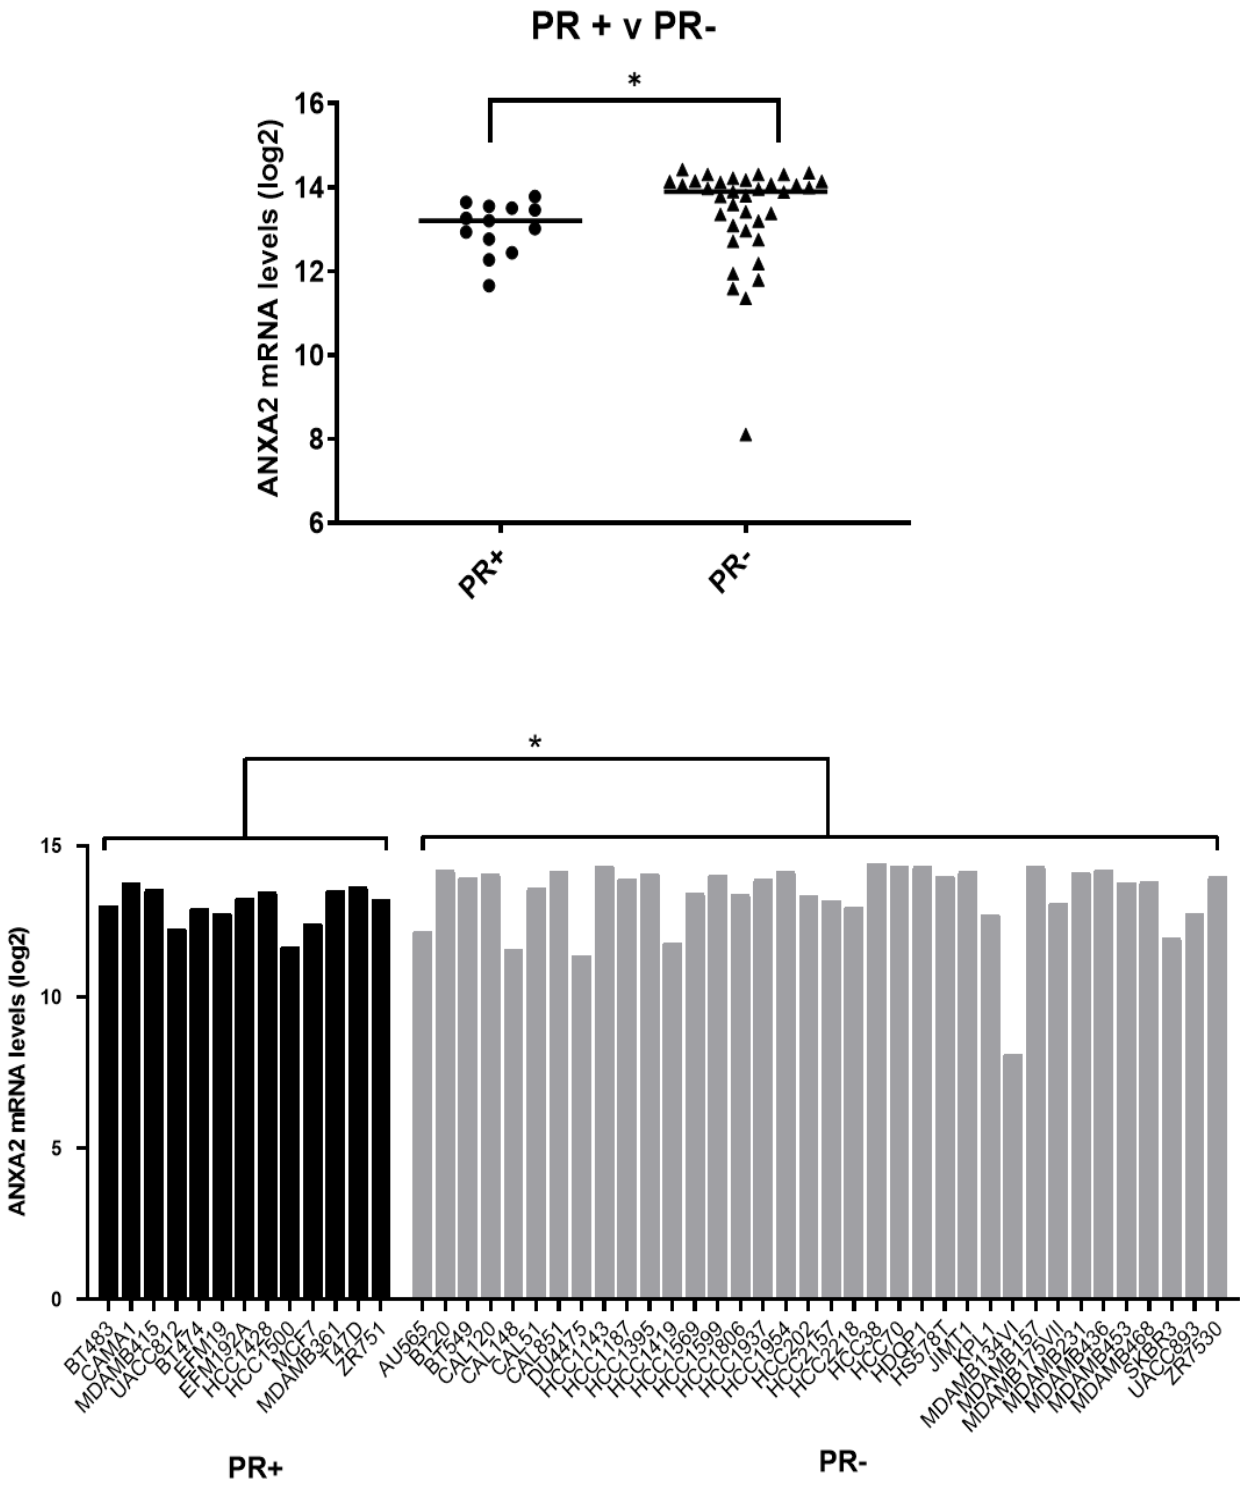

**Figure S3:** Publicly available Affymetrix gene expression data for human breast cancer cell lines was obtained from the CCLE [2]. Cell lines were categorised according to ER, PR and HER2 expression status and difference in ANXA2 expression between the two groups was measured using Mann-Whitney U test. (A) ANXA2 expression is higher in ER- cell lines,  $p = 0.0008$  (B) ANXA2 expression is higher in PR- cell lines,  $p = 0.0244$  (C) ANXA2 expression is not significantly different between HER2+ and HER2- cell lines.  $p = 0.0769$

[2]: Barretina, J., et al. (2012). "The Cancer Cell Line Encyclopedia enables predictive modelling of anticancer drug sensitivity." *Nature* **483**(7391): 603-607.

**Figure S3 (C)**

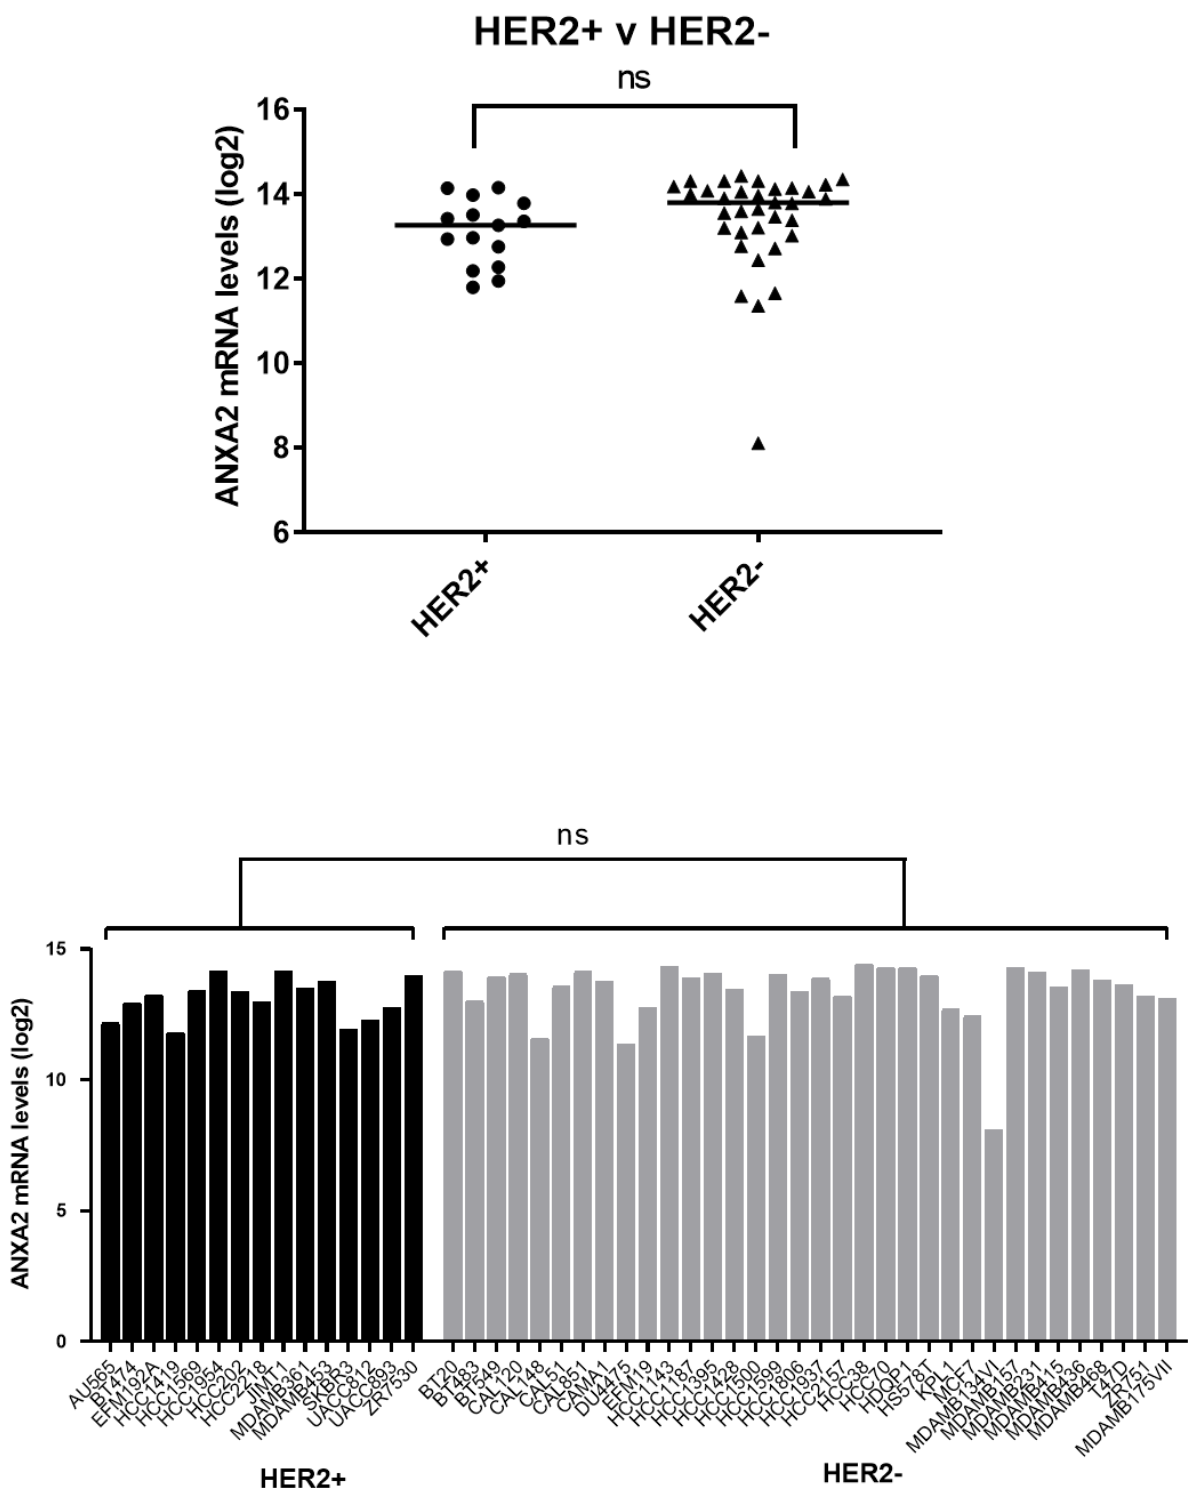

**Figure S3:** Publicly available Affymetrix gene expression data for human breast cancer cell lines was obtained from the CCLE [2]. Cell lines were categorised according to ER, PR and HER2 expression status and difference in ANXA2 expression between the two groups was measured using Mann-Whitney U test. (A) ANXA2 expression is higher in ER- cell lines,  $p = 0.0008$  (B) ANXA2 expression is higher in PR- cell lines,  $p = 0.0244$  (C) ANXA2 expression is not significantly different between HER2+ and HER2- cell lines.  $p = 0.0769$

[2]: Barretina, J., et al. (2012). "The Cancer Cell Line Encyclopedia enables predictive modelling of anticancer drug sensitivity." *Nature* **483**(7391): 603-607.

# Figure S4

**A**

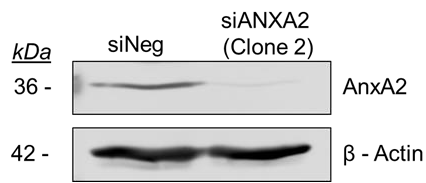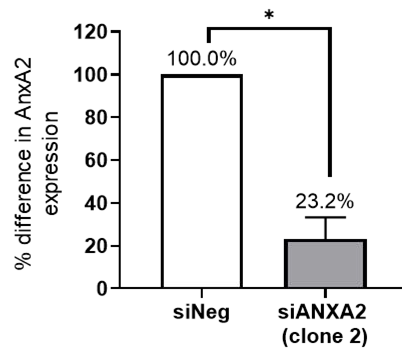

**B**

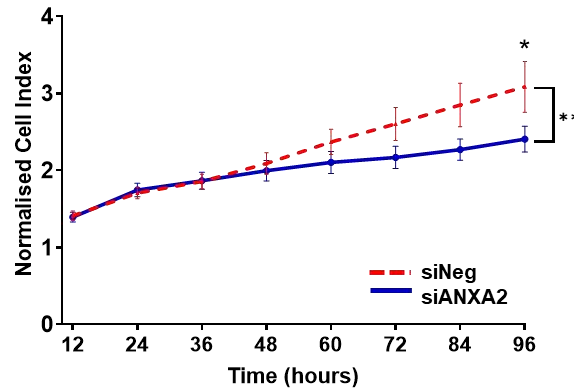

**C**

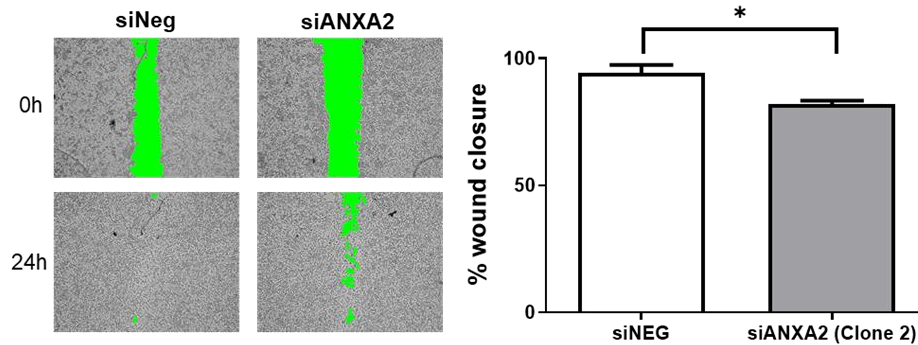

**D**

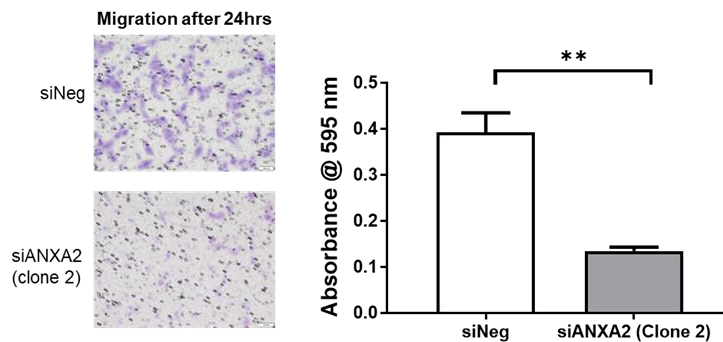

## Figure S4. Additional functional assays with second siRNA clone on MDA-MB-231 cells.

(A) Efficiency of ANXA2 knockdown (KD) with Clone 2 after 72h and densitometry analysis of Annexin A2 normalised against beta-actin loading control. (B) To measure cell proliferation, KD and negative control cells were seeded in duplicate into E-plate wells and the rate of proliferation was measured in real-time using the xCELLigence system. Proliferation of KD cells (blue) was compared to the proliferation of negative control wells (red) over the course of 96 hours. Data displayed as mean cell index  $\pm$  SEM,  $n=3$ . (C) To measure wound healing migration, knockdown and negative control cells were plated into dishes containing Ibidi Culture Inserts. After 72h, the inserts were removed to generate a cell free wound. The green zone indicates the wound size as measured at 0h and 24h post-removal of insert by imaging at 4X magnification and analysis on Image J. Data displayed as % wound closure for 3 fields of view per condition  $\pm$  SEM,  $p=0.0213$ . (D) To measure EGF directed cell migration, cells were plated onto the upper chamber of transwell membrane and allowed to migrate towards 50ng/mL EGF chemoattractant for 24 hours. Cells were removed from the upper chamber of the membrane, leaving only those that had migrated to the lower chamber. Migrated cells were stained with crystal violet and imaged using an inverted light microscope. Crystal violet stain was dissolved and intensity measured as absorbance at 595nm in triplicate. Data displayed as mean absorbance values for 3 triplicate measurements per condition  $\pm$  SEM,  $p=0.0038$ .

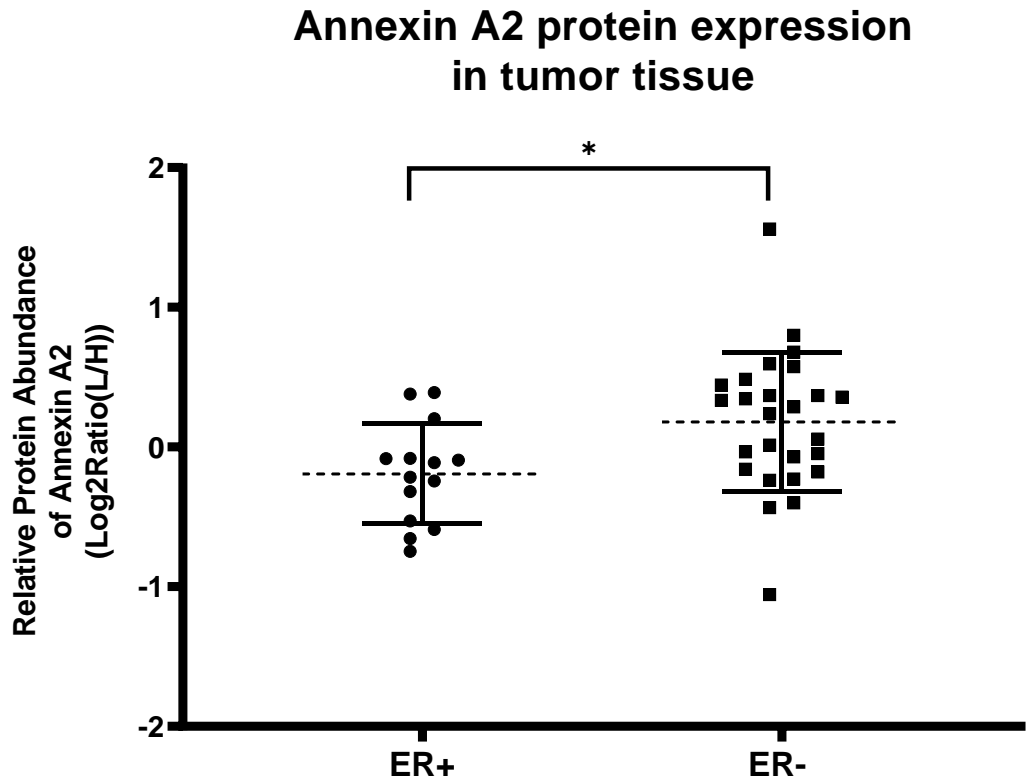

**Figure S5:** Graphs of Annexin A2 protein expression data in breast cancer tissue from S. Tyanova *et. al.* (2016)[3], stratified according to ER status (ER+ n=14 , ER- n=26). Analysis showed Annexin A2 is significantly upregulated in ER- breast cancer tumor tissue (p= 0.0185). Protein expression represented as log2 normalised protein expression, as measured by quantitative proteomics and SILAC labelling. Statistical difference between groups tested using Student's t-test.

[3] Tyanova, S., et al. (2016). "Proteomic maps of breast cancer subtypes." Nat Commun 7: 10259.



# Figure S6

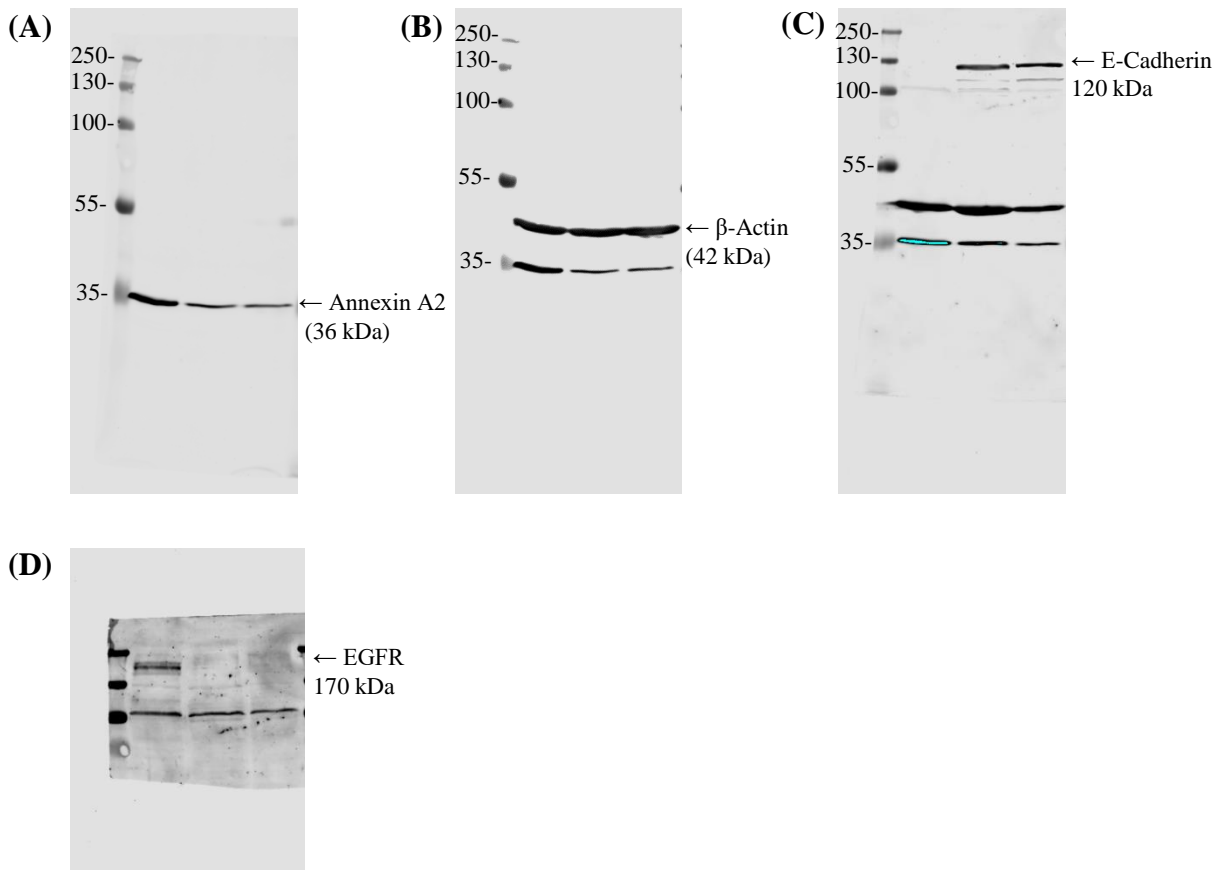

## Figure S6 Full blots for Figure 3 (A) Comparison of Annexin A2 expression in three breast cancer cell lines

Displayed in order of antibody probing (A) Probed with Annexin A2 antibody (mouse) and IRdye700- secondary antibody (B) Probed with B-Actin antibody (mouse) and IRdye700- secondary antibody (C) Probed with E-cadherin (rabbit) and IRdye800- secondary antibody. (Overexposure on Annexin band due to repeated probings, (A) was used for densitometry) (D) Probed with EGFR mouse and IRdye700- secondary antibody. Blot was cut in half.

# Figure S7

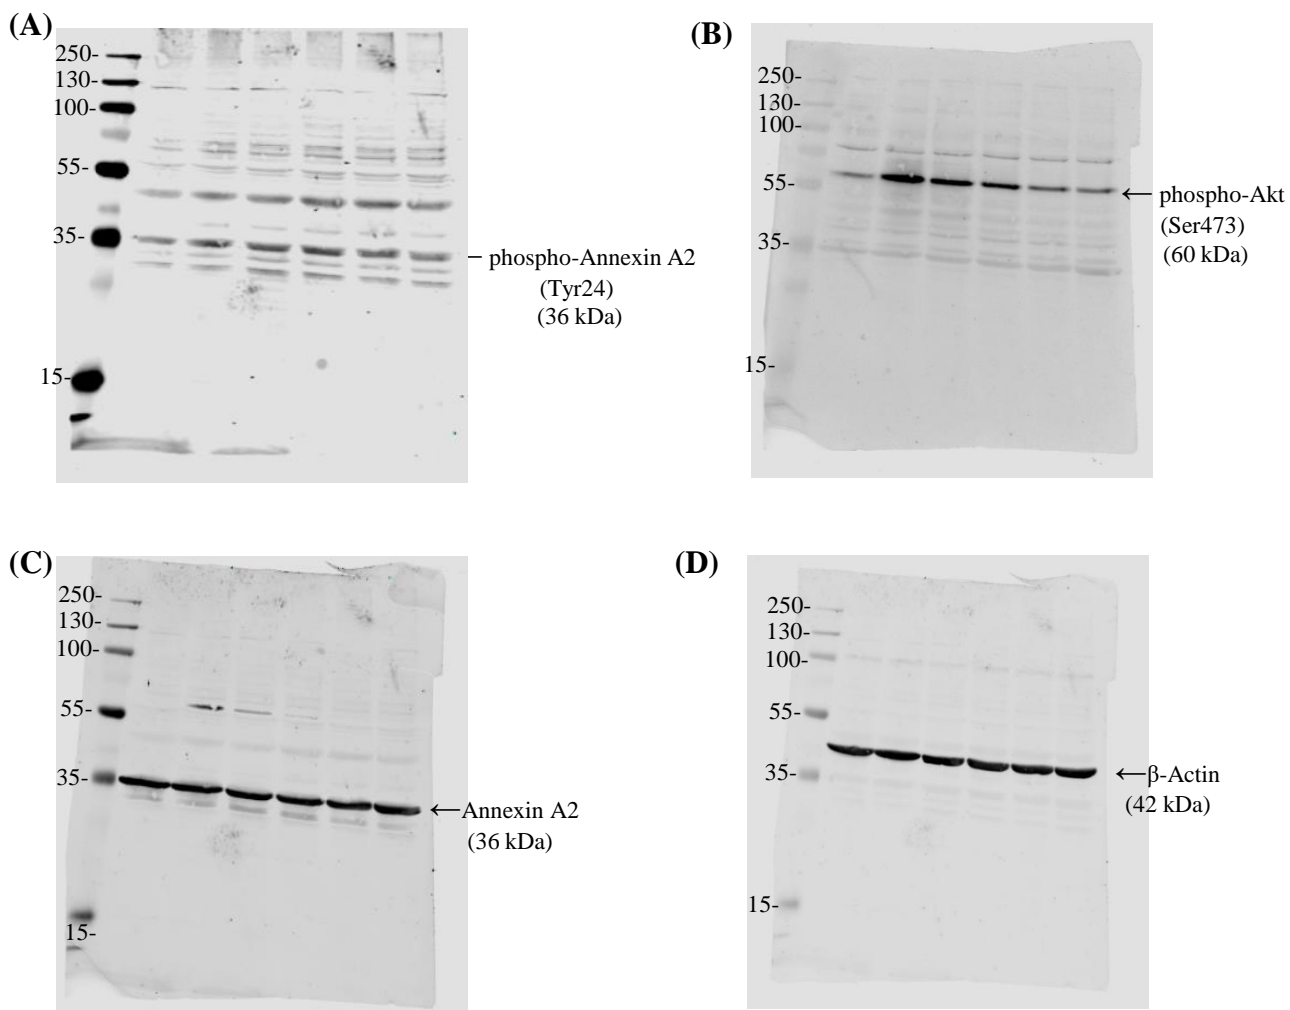

**Figure S7 Full blots for Figure 3 (E) Western blot showing the effect of EGF stimulation on AnxA2 expression and phosphorylation in MDA-MB-231 cells.** Displayed in order of antibody probing (A) Probed with phospho-Annexin A2 (Tyr24) antibody (mouse) and IRdye700- secondary antibody (B) Probed with phospho-Akt (Ser473) antibody (rabbit) and IRdye800- secondary antibody (C) Probed with Annexin A2 (Rabbit) and IRdye800- secondary antibody (D) Probed with B-Actin antibody (mouse) and IRdye700- secondary antibody

# Figure S8

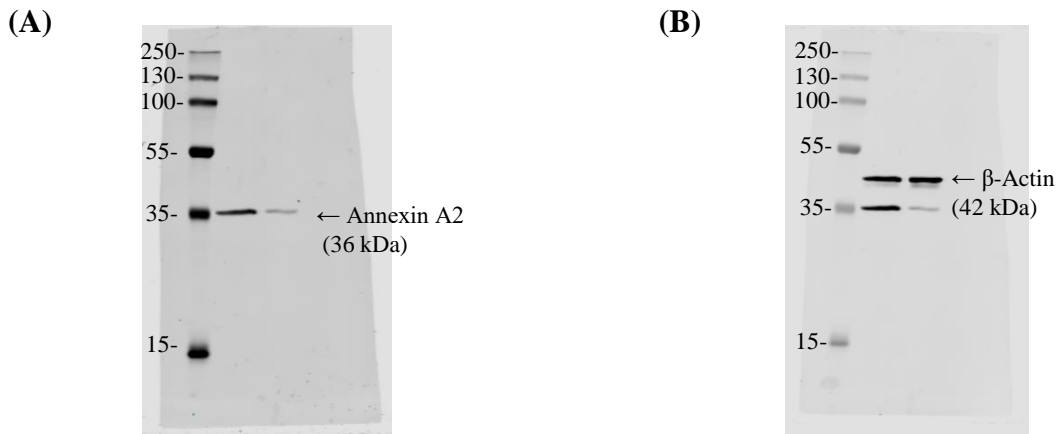

**Figure S8 Full blots for Figure 4 (A) MDA-MB-231 cells were transfected with a small interference oligonucleotide against ANXA2 [10 nM] for 72 hours, using the Neon Transfection system. Representative blot showing the efficiency of ANXA2 knockdown.**

Displayed in order of antibody probing (A) Probed with Annexin A2 antibody (mouse) and IRdye700- secondary antibody (B) Probed with B-Actin antibody (mouse) and IRdye700- secondary antibody

**Table S1** List of newly synthesised proteins identified in 2-D migration experiment

| Accession  | Score | Mass   | Identified protein (Gene symbol) |
|------------|-------|--------|----------------------------------|
| 1568551    | 440   | 13928  | HIST1H2BE                        |
| 1147813    | 245   | 334023 | DSP                              |
| 7669492    | 157   | 36201  | GAPDH                            |
| 32097      | 153   | 11317  | HIST2H4A                         |
| 4506763    | 352   | 12276  | S100A3                           |
| 28336      | 128   | 42128  | ACTB                             |
| 3891470    | 186   | 14992  | LGALS7                           |
| 4505591    | 46    | 22324  | PRDX1                            |
| 307504     | 54    | 77121  | TGM3                             |
| 29789445   | 72    | 115462 | DSG4                             |
| 1032207174 | 121   | 14338  | HIST1H2AB                        |
| 4506773    | 64    | 13291  | S100A9                           |
| 61966777   | 95    | 44946  | VSIG8                            |
| 30506      | 49    | 114670 | DSG1                             |
| 494066     | 51    | 23438  | GSTP1                            |
| 35222      | 83    | 71209  | HSPA6                            |
| 15928913   | 30    | 21186  | HSPB1                            |
| 34412      | 30    | 79911  | LTF                              |
| 47825361   | 35    | 30942  | NCCRP1                           |
| 4505821    | 64    | 16847  | PIP                              |
| 535015     | 100   | 81637  | PKP1                             |
| 35959      | 24    | 50055  | TUBB4A                           |
| 194389794  | 24    | 61600  | ANPEP                            |
| 4757756    | 64    | 38808  | ANXA2                            |
| 619383     | 32    | 28317  | APOD                             |
| 38026      | 29    | 34942  | AZGP1                            |
| 4557367    | 36    | 53155  | BLMH                             |
| 13929432   | 16    | 26304  | CABP1                            |
| 379642577  | 25    | 19979  | CALHM4                           |
| 336038727  | 20    | 22696  | COX1                             |
| 4503143    | 43    | 45037  | CTSD                             |
| 14278227   | 47    | 16302  | DFFA                             |
| 1033647300 | 35    | 46672  | GNE                              |
| 20810274   | 16    | 47787  | GOT1L1                           |
| 533693     | 29    | 81277  | GPD2                             |
| 20805939   | 17    | 31353  | HUS1B                            |
| 455852     | 14    | 3914   | ITIH2                            |
| 119590706  | 21    | 54000  | KIAA2012                         |
| 5031857    | 21    | 36950  | LDHA                             |
| 179531     | 26    | 26229  | LGALS3                           |
| 62988340   | 17    | 61327  | LRIT2                            |
| 556708028  | 15    | 67365  | MT-ND5                           |
| 3643107    | 16    | 72739  | PIAS1                            |
| 2992541    | 19    | 205150 | PPL                              |
| 3318841    | 15    | 25011  | PRDX6                            |
| 34276      | 20    | 132298 | PTPRC                            |
| 365812818  | 14    | 4207   | RBM5                             |
| 29888      | 31    | 10988  | S100A8                           |
| 10435945   | 23    | 26222  | SELENBP1                         |
| 187302     | 19    | 27873  | SFN                              |
| 5803185    | 22    | 28889  | SYPL1                            |
| 440576057  | 18    | 6045   | TNS4                             |
| 37492      | 35    | 50810  | TUBA1A                           |
| 1065111    | 19    | 11629  | TXN                              |
| 115529037  | 31    | 6110   | ZNF61                            |

**Table S2** List of newly synthesised proteins identified in 3-D invasion experiment.

| Accession  | Score | Mass   | Identified protein (Gene symbol) |
|------------|-------|--------|----------------------------------|
| 194384240  | 2042  | 59042  | KRT5                             |
| 4501885    | 385   | 42052  | ACTB                             |
| 7669492    | 401   | 36201  | GAPDH                            |
| 3891470    | 671   | 14992  | LGALS7                           |
| 158254664  | 217   | 42362  | ACTC1                            |
| 4506773    | 306   | 13291  | S100A9                           |
| 194382264  | 220   | 19161  | JUP                              |
| 4757756    | 169   | 38808  | ANXA2                            |
| 190668     | 114   | 11564  | S100A7                           |
| 1025735746 | 59    | 49249  | TUBA1A                           |
| 4885111    | 164   | 16937  | CALML3                           |
| 7673316    | 132   | 15911  | CALML5                           |
| 338695     | 35    | 50240  | TUBB                             |
| 14278227   | 136   | 16302  | DFFA                             |
| 307504     | 99    | 77121  | TGM3                             |
| 1004171516 | 52    | 12003  | HIST1H3A                         |
| 186837     | 48    | 205178 | LAMB1                            |
| 32015      | 45    | 50503  | TUBA4A                           |
| 1552516    | 38    | 27092  | PRSS3P2                          |
| 5174661    | 35    | 11206  | S100A2                           |
| 29446      | 32    | 16070  | HBB                              |
| 5031857    | 29    | 36950  | LDHA                             |
| 38026      | 57    | 34942  | AZGP1                            |
| 4557581    | 50    | 15497  | FABP5                            |
| 494066     | 37    | 23438  | GSTP1                            |
| 7329718    | 36    | 257758 | VPS13D                           |
| 37492      | 34    | 50810  | TUBA1A                           |
| 47825361   | 33    | 30942  | NCCRP1                           |
| 4885165    | 30    | 11000  | CSTA                             |
| 37183160   | 29    | 19588  | ZG16B                            |
| 4504165    | 27    | 86043  | GSN                              |
| 296734     | 27    | 19590  | PSMB6                            |
| 37403      | 26    | 73052  | NTRK1                            |
| 3170180    | 26    | 49156  | SDCCAG8                          |
| 5457357    | 25    | 88884  | AFG3L2                           |
| 35222      | 25    | 71209  | HSPA6                            |
| 18098558   | 24    | 99380  | PIWIL1                           |
| 164598948  | 23    | 32098  | ABO                              |
| 657232307  | 22    | 12915  | PPL                              |
| 22760940   | 21    | 22072  | PERP                             |
| 21755948   | 20    | 55672  | A2ML1                            |
| 215261502  | 20    | 25318  | SPTAN1                           |
| 307265     | 19    | 30421  | HLA-DRB1                         |
| 4261629    | 19    | 5820   | PIGA                             |
| 13540600   | 18    | 38523  | NDEL1                            |
| 5803225    | 17    | 29326  | YWHAE                            |
| 1125020    | 17    | 58289  | ZRSR2P1                          |
| 34226      | 16    | 297083 | LAMA1                            |
| 16549271   | 16    | 41471  | PPM1K                            |
| 75750526   | 15    | 18654  | DUSP28                           |
| 1203796    | 15    | 56567  | STK3                             |
| 15928896   | 15    | 76589  | SYTL4                            |
| 3360457    | 14    | 39478  | CUL3                             |
| 54696744   | 14    | 30831  | DCK                              |
| 4507503    | 14    | 56244  | KLF11                            |
| 6912680    | 14    | 44964  | SPO11                            |

**Table S3.** Sequences of the small interfering RNA used for ANXA2 knockdown.

| Clone no. | Target sequence       | Product no. | Working Concentration |
|-----------|-----------------------|-------------|-----------------------|
| 1         | CGGCAAGTCCCTGTACTATTA | Hs_ANXA2_8  | 10nM                  |
| 2         | CACGGCCTGAGCGTCCAGAAA | Hs_ANXA2_10 | 10nM                  |

**Table S4:** Clinical information of local breast cancer cohort (n=30)

|                      |                    |
|----------------------|--------------------|
| Mean age ( $\pm$ sd) | 57.5 ( $\pm$ 12.1) |
| <i>Unknown</i>       | 5                  |
| Histology            |                    |
| <i>Ductal</i>        | 22                 |
| <i>Lobular</i>       | 2                  |
| <i>Mixed</i>         | 2                  |
| <i>Other</i>         | 1                  |
| <i>Unknown</i>       | 3                  |
| Stage                |                    |
| <i>I</i>             | 4                  |
| <i>II</i>            | 15                 |
| <i>III</i>           | 7                  |
| <i>IV</i>            | 0                  |
| <i>O</i>             | 1                  |
| <i>Unknown</i>       | 3                  |
| Grade                |                    |
| <i>1</i>             | 1                  |
| <i>2</i>             | 18                 |
| <i>3</i>             | 7                  |
| <i>Unknown</i>       | 4                  |
| Lymph node           |                    |
| <i>Positive</i>      | 14                 |
| <i>Negative</i>      | 13                 |
| <i>Unknown</i>       | 3                  |
| ER status            |                    |
| <i>Positive</i>      | 24                 |
| <i>Negative</i>      | 2                  |
| <i>Unknown</i>       | 4                  |
| PR status            |                    |
| <i>Positive</i>      | 16                 |
| <i>Negative</i>      | 8                  |
| <i>Unknown</i>       | 6                  |
| HER-2 status         |                    |
| <i>Positive</i>      | 1                  |
| <i>Negative</i>      | 24                 |
| <i>Unknown</i>       | 5                  |

**Table S5:** Clinical information of GSE42568 breast cancer cohort (n=104)

|                      |                    |
|----------------------|--------------------|
| Mean age ( $\pm$ sd) | 58.8 ( $\pm$ 11.8) |
| Grade                |                    |
| <i>1</i>             | 11                 |
| <i>2</i>             | 40                 |
| <i>3</i>             | 53                 |
| Lymph node           |                    |
| <i>Positive</i>      | 59                 |
| <i>Negative</i>      | 45                 |
| ER status            |                    |
| <i>Positive</i>      | 67                 |
| <i>Negative</i>      | 34                 |
| <i>Unknown</i>       | 3                  |
